# Supplementary material for: Stability, biofunctional, and antimicrobial characteristics of cannabidiol isolate for the design of topical formulations
Source: Royal Society of Chemistry journal article supplement (doi:10.1039/d3sm01466e), 2024-01-01
Supplement: d3sm01466e1.pdf [file d3sm01466e1.pdf]

## **Supplementary Information**

### Stability, Biofunctional, and Antimicrobial Characteristics of Cannabidiol -Isolate for the Design of Topical Formulations

Sreejarani Kesavan Pillai,<sup>a</sup> Nazia Kera,<sup>a,b</sup> Phuemele Kleyi,<sup>a</sup> Marinda deBeer,<sup>a</sup> Matin Magwaza,<sup>c</sup> Suprakas Sinha Ray<sup>a,b\*</sup>

<sup>a</sup>Centre for Nanostructures and Advanced Materials, DSI-CSIR Nanotechnology Innovation Centre, Council for Scientific and Industrial Research, Pretoria 0001, South Africa.

Email: [rsuprakas@csir.co.za](mailto:rsuprakas@csir.co.za)

<sup>b</sup>Department of Chemical Sciences, University of Johannesburg, Droonfontein 2028, Johannesburg, South Africa. Email: [ssinharay@uj.ac.za](mailto:ssinharay@uj.ac.za)

<sup>c</sup>Tautomer Bioscience Pty Ltd., 260 Cradock Ave, Lyttelton Manor, Centurion, 0157, South Africa.

# <sup>1</sup>H NMR spectrum of CBD-IS

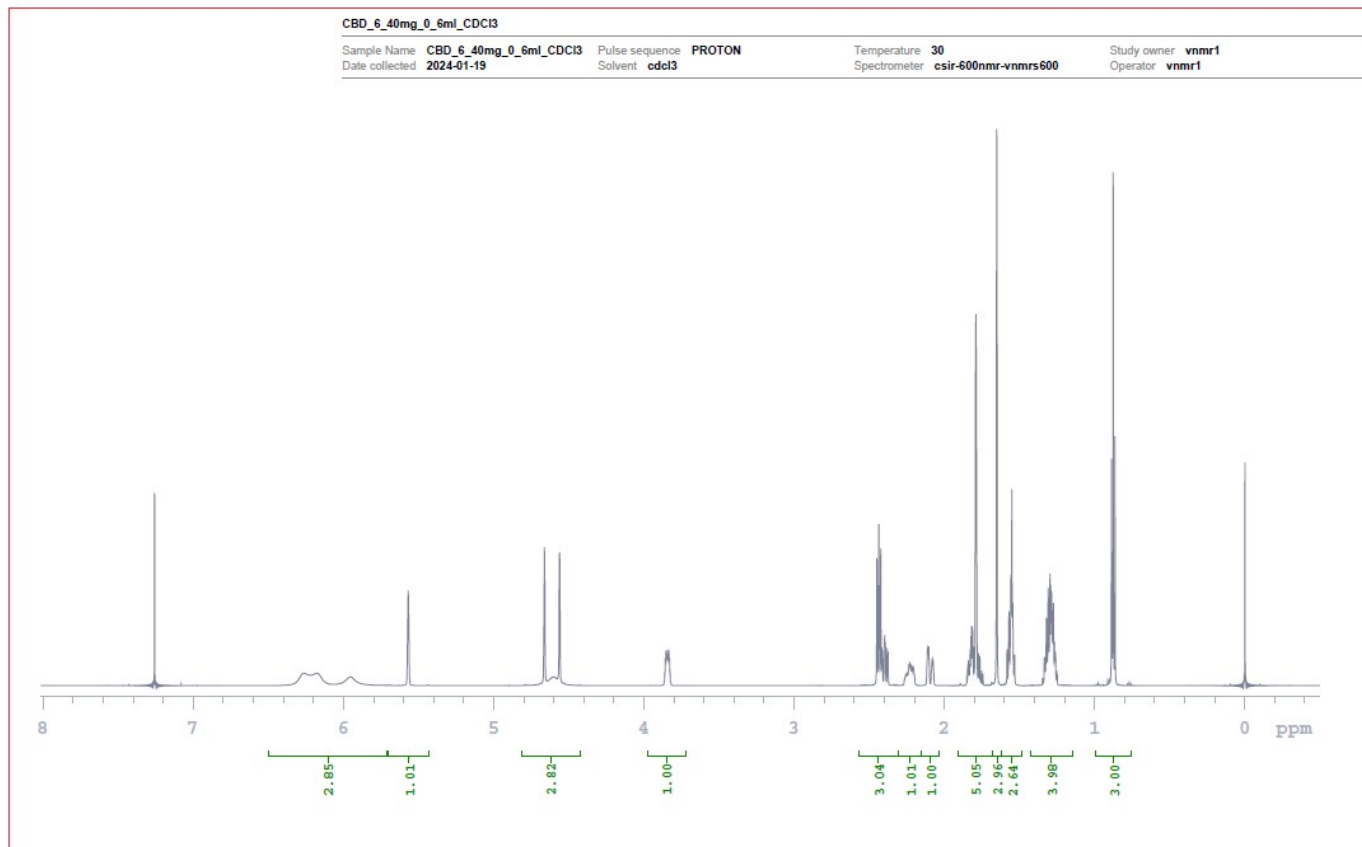

CBD\_6\_40mg\_0\_6ml\_CDCI3

Sample Name **CBD\_6\_40mg\_0\_6ml\_CDCI3** Pulse sequence **PROTON** Temperature **30** Study owner **vnmr1**  
 Date collected **2024-01-19** Solvent **cdci3** Spectrometer **csir-600nmr-vnmrs600** Operator **vnmr1**

CBD (6.40mg / 0.6ml CDCI3) / 18.01.2024

| SAMPLE                                                                                                       |  | wet        | n      | INTEGRAL VALUES(CONTINUED) |            |          |       | PEAK FREQUENCIES(CONTINUED) |           |           |
|--------------------------------------------------------------------------------------------------------------|--|------------|--------|----------------------------|------------|----------|-------|-----------------------------|-----------|-----------|
| date                                                                                                         |  | SPECIAL    |        | Integral                   | start(ppm) | end      | value | index                       | freq(ppm) | intensity |
| Jan 19 2024                                                                                                  |  |            |        | 10                         | 2.56984    | 2.30188  | 3.039 | 32                          | 2.37568   | 6.71764   |
| solvent <b>cdci3</b>                                                                                         |  |            |        | 11                         | 2.30188    | 2.30188  | 0.000 | 33                          | 2.26093   | 1.78604   |
| file <b>/home/vnmr1/vnmrsys/data/CBD_6_40mg_0_6ml_CDCI3_20240118_01/CBD_6_40mg_0_6ml_CDCI3_PROTON_01.fid</b> |  | temp       | 30.0   | 12                         | 2.30188    | 2.1532   | 1.009 | 34                          | 2.25678   | 2.19732   |
|                                                                                                              |  | gain       | 48     | 13                         | 2.1532     | 2.1532   | 0.000 | 35                          | 2.2547    | 2.12923   |
|                                                                                                              |  | spin       | 20     | 14                         | 2.1532     | 2.03392  | 0.997 | 36                          | 2.2521    | 2.02042   |
|                                                                                                              |  | hst        | 0.008  | 15                         | 2.03392    | 1.90598  | 0.000 | 37                          | 2.24847   | 2.24547   |
|                                                                                                              |  | pw90       | 6.400  | 16                         | 1.90598    | 1.67778  | 5.049 | 38                          | 2.24691   | 2.36444   |
|                                                                                                              |  | alfa       | 10.000 | 17                         | 1.67778    | 1.67778  | 0.000 | 39                          | 2.24483   | 2.27157   |
|                                                                                                              |  | FLAGS      |        | 18                         | 1.67778    | 1.619    | 2.956 | 40                          | 2.24224   | 2.34386   |
|                                                                                                              |  |            |        | 19                         | 1.619      | 1.61555  | 0.003 | 41                          | 2.23757   | 3.68832   |
|                                                                                                              |  |            |        | 20                         | 1.61555    | 1.48416  | 2.637 | 42                          | 2.23549   | 3.93453   |
|                                                                                                              |  |            |        | 21                         | 1.48416    | 1.42365  | 0.001 | 43                          | 2.23341   | 4.05291   |
|                                                                                                              |  |            |        | 22                         | 1.42365    | 1.14877  | 3.976 | 44                          | 2.23133   | 4.20138   |
|                                                                                                              |  |            |        | 23                         | 1.14877    | 0.98972  | 0.001 | 45                          | 2.22874   | 4.28472   |
|                                                                                                              |  |            |        | 24                         | 0.98972    | 0.751145 | 3.000 | 46                          | 2.22718   | 4.23524   |
|                                                                                                              |  | PROCESSING |        | 25                         | 0.751145   | -0.49622 | 0.456 | 47                          | 2.22199   | 3.15983   |
|                                                                                                              |  |            |        | 48                         |            |          |       | 48                          | 2.21887   | 3.49274   |
|                                                                                                              |  |            |        | 49                         |            |          |       | 49                          | 2.21732   | 3.65669   |
|                                                                                                              |  |            |        | 50                         |            |          |       | 50                          | 2.21524   | 3.49992   |
|                                                                                                              |  |            |        | 51                         |            |          |       | 51                          | 2.21264   | 3.43551   |
|                                                                                                              |  |            |        | 52                         |            |          |       | 52                          | 2.21005   | 3.47971   |
|                                                                                                              |  |            |        | 53                         |            |          |       | 53                          | 2.20797   | 3.67092   |
|                                                                                                              |  |            |        | 54                         |            |          |       | 54                          | 2.20641   | 3.48912   |
|                                                                                                              |  |            |        | 55                         |            |          |       | 55                          | 2.20381   | 2.97625   |
|                                                                                                              |  |            |        | 56                         |            |          |       | 56                          | 2.11295   | 7.04729   |
|                                                                                                              |  |            |        | 57                         |            |          |       | 57                          | 2.10879   | 7.68561   |
|                                                                                                              |  |            |        | 58                         |            |          |       | 58                          | 2.10464   | 7.67857   |
|                                                                                                              |  |            |        | 59                         |            |          |       | 59                          | 2.08283   | 4.7288    |
|                                                                                                              |  |            |        | 60                         |            |          |       | 60                          | 2.07868   | 5.06894   |
|                                                                                                              |  |            |        | 61                         |            |          |       | 61                          | 2.07452   | 4.78876   |
|                                                                                                              |  |            |        | 62                         |            |          |       | 62                          | 1.85021   | 1.86842   |
|                                                                                                              |  |            |        | 63                         |            |          |       | 63                          | 1.84502   | 3.50049   |
|                                                                                                              |  |            |        | 64                         |            |          |       | 64                          | 1.84035   | 4.94209   |
|                                                                                                              |  |            |        | 65                         |            |          |       | 65                          | 1.83568   | 4.30479   |
|                                                                                                              |  |            |        | 66                         |            |          |       | 66                          | 1.82841   | 6.98674   |
|                                                                                                              |  |            |        | 67                         |            |          |       | 67                          | 1.82373   | 9.68896   |
|                                                                                                              |  |            |        | 68                         |            |          |       | 68                          | 1.81854   | 11.7216   |
|                                                                                                              |  |            |        | 69                         |            |          |       | 69                          | 1.81283   | 11.4459   |
|                                                                                                              |  |            |        | 70                         |            |          |       | 70                          | 1.80971   | 6.53811   |
|                                                                                                              |  |            |        | 71                         |            |          |       | 71                          | 1.804     | 7.62622   |
|                                                                                                              |  |            |        | 72                         |            |          |       | 72                          | 1.7905    | 72.872    |
|                                                                                                              |  |            |        | 73                         |            |          |       | 73                          | 1.77389   | 6.36044   |
|                                                                                                              |  |            |        | 74                         |            |          |       | 74                          | 1.77181   | 5.67513   |
|                                                                                                              |  |            |        | 75                         |            |          |       | 75                          | 1.76506   | 5.76716   |
|                                                                                                              |  |            |        | 76                         |            |          |       | 76                          | 1.76298   | 5.15783   |
|                                                                                                              |  |            |        | 77                         |            |          |       | 77                          | 1.75208   | 2.97686   |
|                                                                                                              |  |            |        | 78                         |            |          |       | 78                          | 1.74377   | 2.32771   |
|                                                                                                              |  |            |        | 79                         |            |          |       | 79                          | 1.65187   | 109.266   |
|                                                                                                              |  |            |        | 80                         |            |          |       | 80                          | 1.58333   | 7.1148    |
|                                                                                                              |  |            |        | 81                         |            |          |       | 81                          | 1.57035   | 14.6051   |
|                                                                                                              |  |            |        | 82                         |            |          |       | 82                          | 1.55736   | 21.723    |

  

| INTEGRAL VALUES |            | PEAK FREQUENCIES |        |       |           |           |
|-----------------|------------|------------------|--------|-------|-----------|-----------|
| Integral        | start(ppm) | end              | value  | index | freq(ppm) | intensity |
| 1               | 8.01045    | 6.49258          | 0.330  | 1     | 7.25652   | 37.8232   |
| 2               | 6.49258    | 5.70827          | 2.854  | 2     | 6.26321   | 2.43232   |
| 3               | 5.70827    | 5.70279          | 0.002  | 3     | 6.1765    | 2.45022   |
| 4               | 5.70279    | 5.42856          | 1.015  | 4     | 5.95271   | 1.72718   |
| 5               | 5.42856    | 4.81163          | 0.000  | 5     | 5.56847   | 18.4486   |
| 6               | 4.81163    | 4.41893          | 2.822  | 6     | 4.66448   | 19.8845   |
| 7               | 4.41893    | 3.97029          | -0.000 | 7     | 4.66189   | 27.1095   |
| 8               | 3.97029    | 3.72019          | 1.003  | 8     | 4.65877   | 20.5263   |
| 9               | 3.72019    | 2.56984          | -0.000 | 9     | 4.59906   | 1.7029    |
|                 |            |                  |        | 10    | 4.56271   | 25.8963   |
|                 |            |                  |        | 11    | 4.56167   | 26.1274   |
|                 |            |                  |        | 12    | 3.8607    | 2.63397   |
|                 |            |                  |        | 13    | 3.85707   | 5.35242   |
|                 |            |                  |        | 14    | 3.85343   | 6.75183   |
|                 |            |                  |        | 15    | 3.85032   | 6.91113   |
|                 |            |                  |        | 16    | 3.84668   | 6.1715    |
|                 |            |                  |        | 17    | 3.84357   | 5.17786   |
|                 |            |                  |        | 18    | 3.83993   | 6.30112   |
|                 |            |                  |        | 19    | 3.8363    | 7.09898   |
|                 |            |                  |        | 20    | 3.83318   | 6.83521   |
|                 |            |                  |        | 21    | 3.82955   | 5.41173   |
|                 |            |                  |        | 22    | 3.82591   | 2.68129   |
|                 |            |                  |        | 23    | 2.44941   | 25.0256   |
|                 |            |                  |        | 24    | 2.43643   | 31.6729   |
|                 |            |                  |        | 25    | 2.42345   | 26.909    |
|                 |            |                  |        | 26    | 2.41774   | 7.53032   |
|                 |            |                  |        | 27    | 2.41203   | 6.91656   |
|                 |            |                  |        | 28    | 2.39801   | 9.89283   |
|                 |            |                  |        | 29    | 2.39489   | 8.74589   |
|                 |            |                  |        | 30    | 2.39282   | 8.48719   |
|                 |            |                  |        | 31    | 2.38087   | 7.32583   |

CBD\_6\_40mg\_0\_6ml\_CDCl3

Sample Name **CBD\_6\_40mg\_0\_6ml\_CDCl3** Pulse sequence **PROTON** Temperature **30** Study owner **vnmr1**  
 Date collected **2024-01-19** Solvent **cdcl3** Spectrometer **csir-600nmr-vnmrs600** Operator **vnmr1**

PEAK FREQUENCIES(CONTINUED)

| index | freq(ppm)    | intensity |
|-------|--------------|-----------|
| 83    | 1.55113      | 38.5026   |
| 84    | 1.54542      | 16.2651   |
| 85    | 1.53244      | 8.1037    |
| 86    | 1.34707      | 1.48511   |
| 87    | 1.34344      | 1.47191   |
| 88    | 1.33513      | 5.60064   |
| 89    | 1.3315       | 5.52299   |
| 90    | 1.32111      | 13.2532   |
| 91    | 1.30969      | 19.1585   |
| 92    | 1.29878      | 20.367    |
| 93    | 1.29723      | 21.9546   |
| 94    | 1.29255      | 19.8184   |
| 95    | 1.28736      | 18.6574   |
| 96    | 1.27853      | 10.4299   |
| 97    | 1.27438      | 16.1969   |
| 98    | 1.26711      | 8.60707   |
| 99    | 1.26192      | 6.67683   |
| 100   | 1.25257      | 2.51454   |
| 101   | 1.24894      | 2.23341   |
| 102   | 0.888067     | 44.5143   |
| 103   | 0.876644     | 100.72    |
| 104   | 0.864701     | 48.9224   |
| 105   | 0.00536304   | 1.81135   |
| 106   | -0.000348576 | 43.8032   |
| 107   | -0.00554095  | 1.78747   |

**Melting point of CBD-IS**

|         | #1   | #2   | #3   | Average | Std Dev |
|---------|------|------|------|---------|---------|
| Mp (°C) | 68.4 | 68.6 | 68.7 | 68.6    | 0.2     |

Instrument details: Buchi Melting Point M-565
